# Supplementary material for: Mechanical and responsive properties of temperature-responsive gels prepared via atom transfer radical polymerization
Source: Royal Society of Chemistry journal article supplement (doi:10.1039/c7py01323j), 2017-01-01
Supplement: c7py01323j1.pdf [file c7py01323j1.pdf]

**Electronic Supplementary Information (ESI)**

**Mechanical and Responsive Properties of Temperature-  
Responsive Gels Prepared via Atom Transfer Radical  
Polymerization**

Chisa Norioka<sup>a</sup>, Akifumi Kawamura<sup>a,b</sup>, Takashi Miyata\*<sup>a,b</sup>

<sup>a</sup> Faculty of Chemistry, Materials and Bioengineering, Kansai University, 3-3-35,  
Yamate-cho, Suita, Osaka 564-8680, Japan.

<sup>b</sup> ORDIST, Kansai University, 3-3-35, Yamate-cho, Suita, Osaka 564-8680, Japan.

Table S1. Conversion of total monomers after the PNIPAAm gels with various crosslinker contents were synthesized by ATRP and FRP.

|                                 |  | Conversion (%) |      |      |      |
|---------------------------------|--|----------------|------|------|------|
| Polymerization temperature (°C) |  | 5              |      | 25   |      |
| Crosslinker content (mol%)      |  | ATRP           | FRP  | ATRP | FRP  |
| 1                               |  | 32.7           | 78.6 | 56.5 | 76.6 |
| 3                               |  | 67.5           | 81.2 | 84.3 | 82.2 |
| 5                               |  | 80.6           | 94.3 | 89.7 | 85.2 |
| 10                              |  | 70.3           | 81.0 | 93.1 | 72.1 |
| 13                              |  | 80.0           | 74.6 | 93.1 | 91.7 |

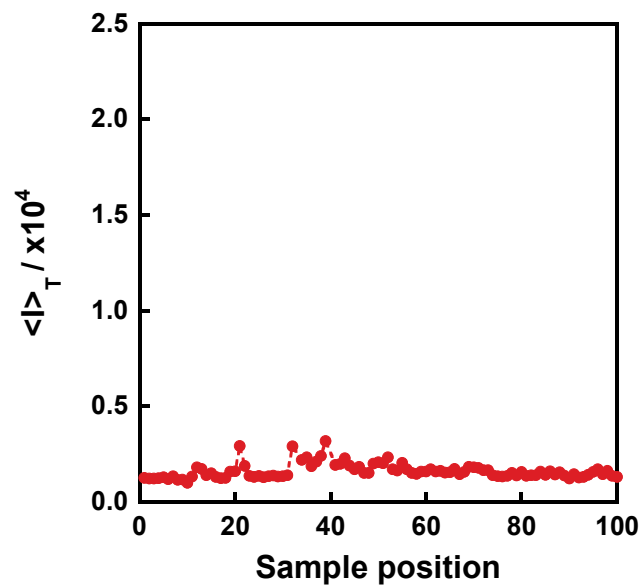

Figure S1. Time average scattered intensity,  $\langle I \rangle_T$ , vs sample position for an aqueous solution containing linear PNIPAAm homopolymer synthesized by ATRP.
